# Supplementary material
Source: PubMed Central journal article supplement (PMC6883117)
Supplement: NIHMS1043667-supplement-Supp_FigS1.pdf [file NIHMS1043667-supplement-Supp_FigS1.pdf]

# Supplemental Figure S1

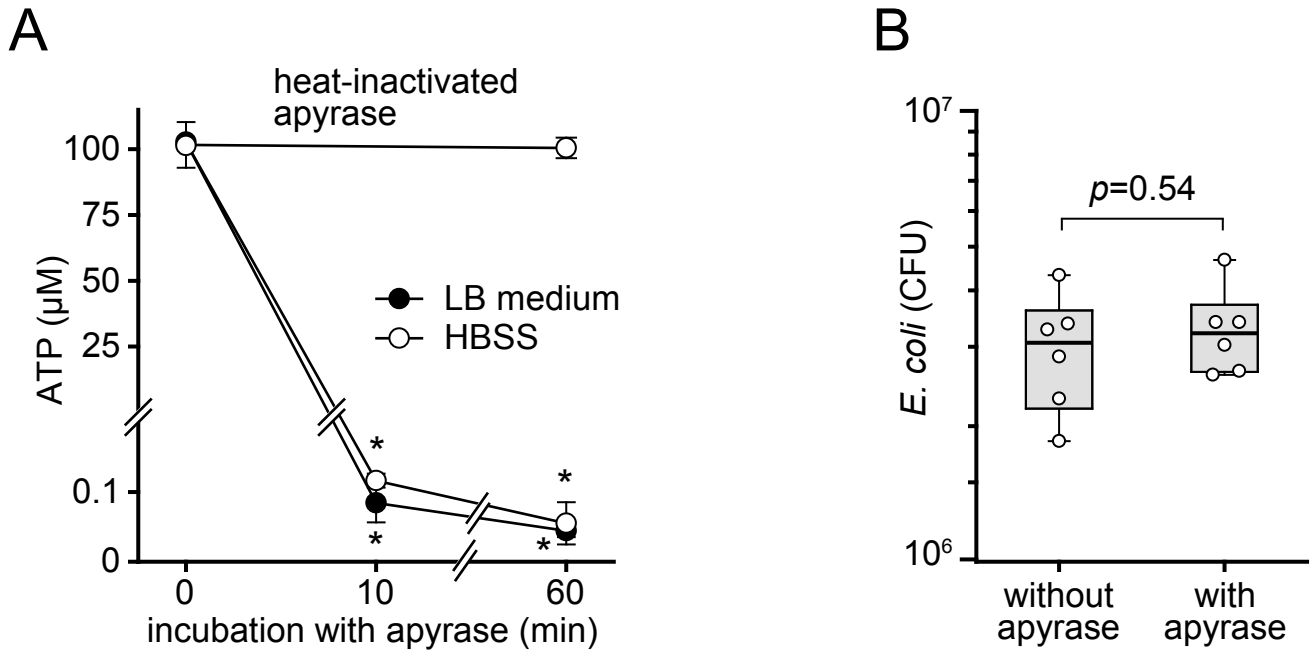

**Figure S1. Apyrase does not affect bacterial growth.** (A) ATP (100  $\mu\text{M}$ ) in HBSS or LB medium was incubated at 37°C with apyrase or heat-inactivated apyrase (5 IU/ml). ATP concentrations were measured at the indicated times with a bioluminescence assay (mean  $\pm$  SD,  $n=3$ , \* $p<0.05$  vs. 0 min, one-way ANOVA). (B) Live *E. coli* ( $1 \times 10^6$ ) in the exponential growth phase were cultured in LB medium in the presence or absence of apyrase (30 IU/ml) at 37°C for 1 h. Then, bacteria were plated on LB agar, incubated at 37°C for 18 h, and colony forming units (CFUs) were counted ( $n=6$  independent experiments, t test).
