# Supplementary material
Source: PubMed Central journal article supplement (PMC6883117)
Supplement: NIHMS1043667-supplement-Supp_TextS1.pdf [file NIHMS1043667-supplement-Supp_TextS1.pdf]

## SUPPLEMENTAL VIDEO LEGENDS

**Video 1. LPS induces global and fMLF induces localized ATP release from PMNs.** Human PMNs were placed into fibronectin-coated glass-bottom dishes and stained with the fluorescent ATP probe 2-2Zn. Cells were stimulated with fMLF (10 nM) or LPS (100 ng/ml) and ATP release was monitored by live-cell fluorescence video microscopy. Images were taken at 1 s intervals. 100x objective.

**Video 2. Stimulation with LPS prevents the coordinated migration of mitochondria towards the leading edge in response to fMLF.** Human PMNs were placed into fibronectin-coated glass-bottom dishes and labeled with the mitochondrial  $\text{Ca}^{2+}$  probe Rhod-2. Cells were stimulated with LPS (100 ng/ml), fMLF (10 nM), or with LPS followed by fMLF 10 min later, and mitochondrial  $\text{Ca}^{2+}$  uptake was recorded by fluorescence microscopy. Superimposed traces of mitochondrial movements are shown in the second row. Images were captured at 1 s intervals. 100x objective.
